# Supplementary material
Source: PubMed Central journal article supplement (PMC1480438)

**Mushroom:  $s > 2r$**

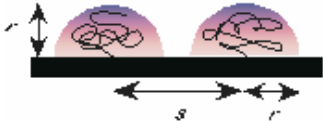

**Brush:  $s < 2r$**

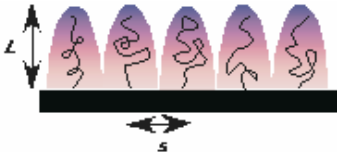

Supplement: pnas_0603521103_1.pdf [file pnas_0603521103_1.pdf]
